# Supplementary material for: Brief communication: The influence of mica-rich rocks on the shear strength of ice-filled discontinuities
Source: Copernicus journal article supplement (doi:10.5194/tc-14-1849-2020), 2020-06-10
Supplement: Supplementary file 1 [file tc-14-1849-2020-supplement.zip]

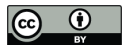

## *Supplement of*

# **Brief communication: The influence of mica-rich rocks on the shear strength of ice-filled discontinuities**

**Philipp Mamot et al.**

*Correspondence to:* Philipp Mamot ([philipp.mamot@tum.de](mailto:philipp.mamot@tum.de))

- [tc-14-1849-2020-supplement-title-page.pdf](#)
- [Data\\_Supplement.xlsx](#)

The copyright of individual parts of the supplement might differ from the CC BY 4.0 License.
